# Supplementary material for: Melamine-based functionalized graphene oxide and zirconium phosphate for high performance removal of mercury and lead ions from water
Source: Royal Society of Chemistry journal article supplement (doi:10.1039/d0ra07546a), 2020-01-01
Supplement: d0ra07546a1.pdf [file d0ra07546a1.pdf]

## **Melamine-based Functionalized Graphene Oxide and Zirconium Phosphate for High Performance Removal of Mercury and Lead Ions from Water**

Ayyob M. Bakry<sup>†‡</sup>, Fathi S. Awad<sup>†§</sup>, Julian A. Bobb<sup>†</sup>, Amr A. Ibrahim<sup>†§</sup>, and M. Samy El-Shall<sup>†\*</sup>

<sup>†</sup>Department of Chemistry, Virginia Commonwealth University, Richmond, VA 23284, USA

<sup>‡</sup>Department of Chemistry, Faculty of Science, Jazan University, Jazan 45142, Saudi Arabia

<sup>§</sup>Chemistry Department, Faculty of Science, Mansoura University, Mansoura 35516, Egypt

### **Supporting Information**

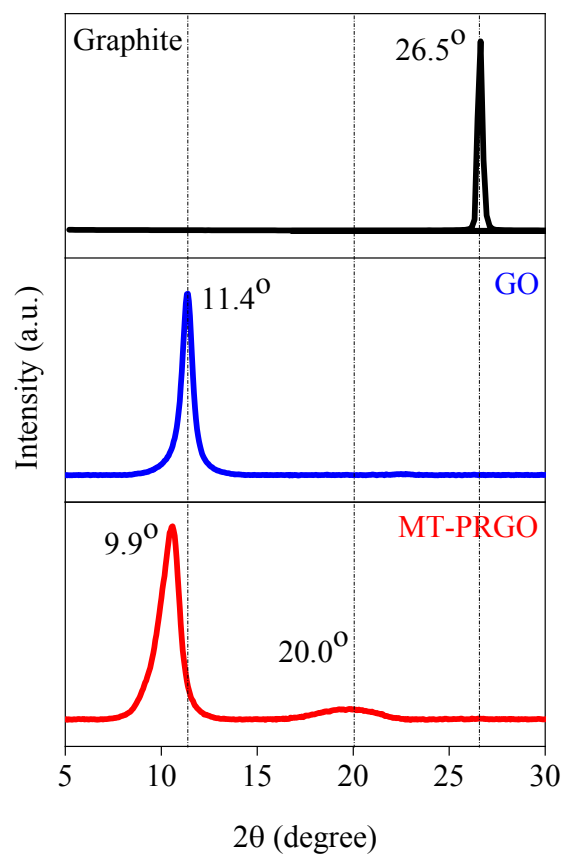

**Figure S1.** XRD patterns of Graphite, GO, and MT-PRGO.

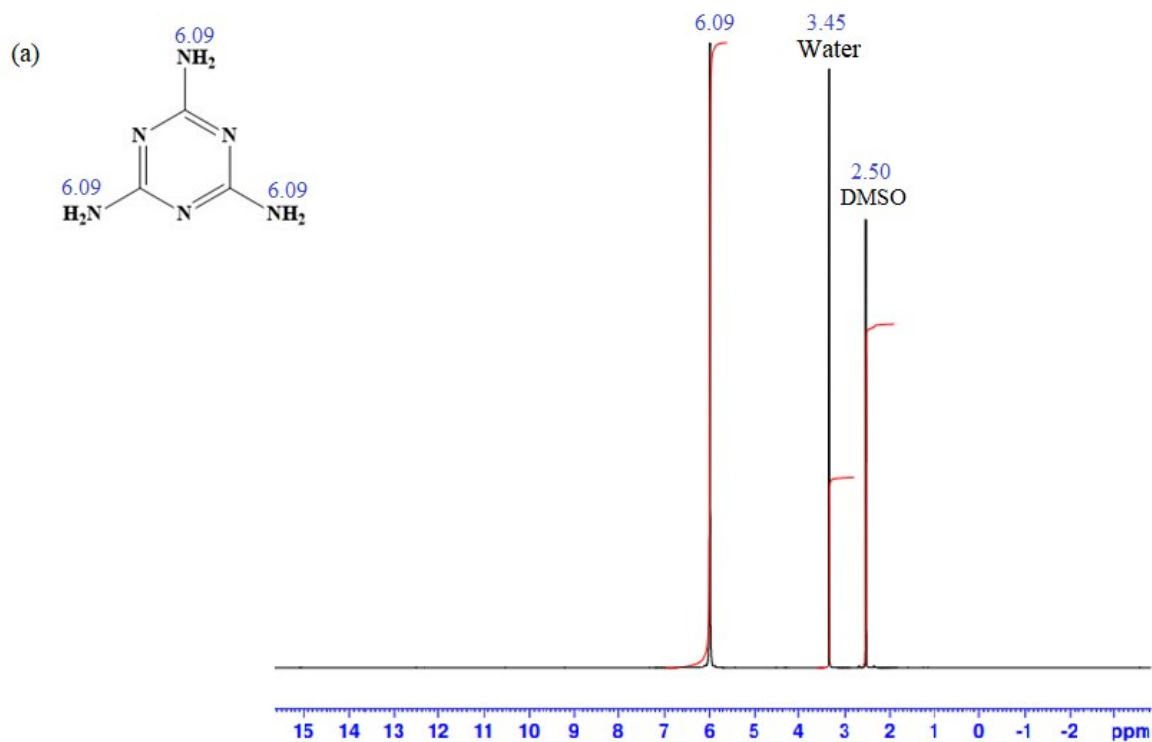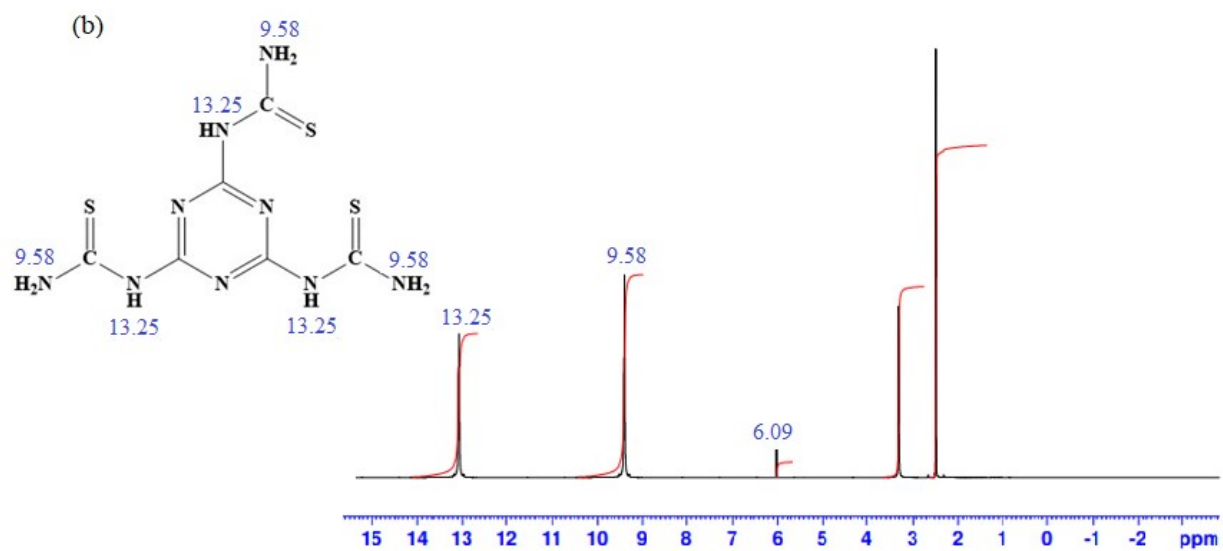

**Figure S2.** <sup>1</sup>H NMR spectra of (a) melamine and (b) melamine thiourea (MT).

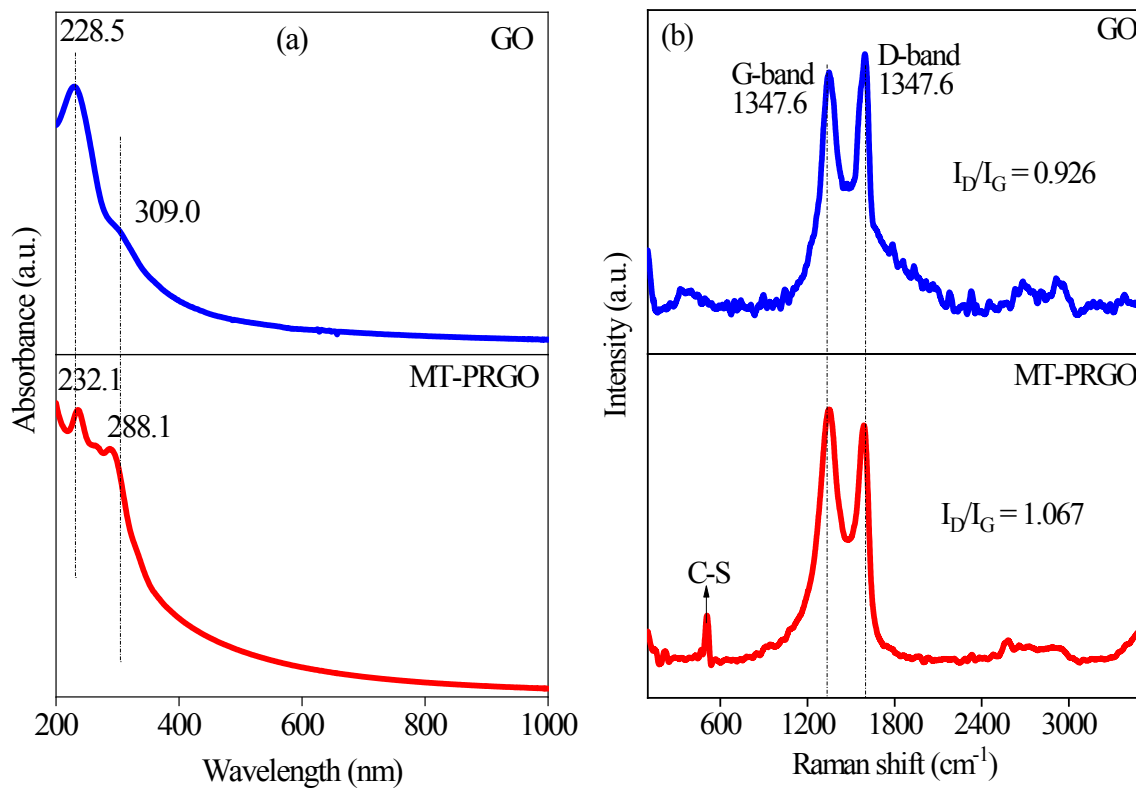

**Figure S3** (a) UV-Vis and (b) Raman spectra of GO and MT-PRGO.

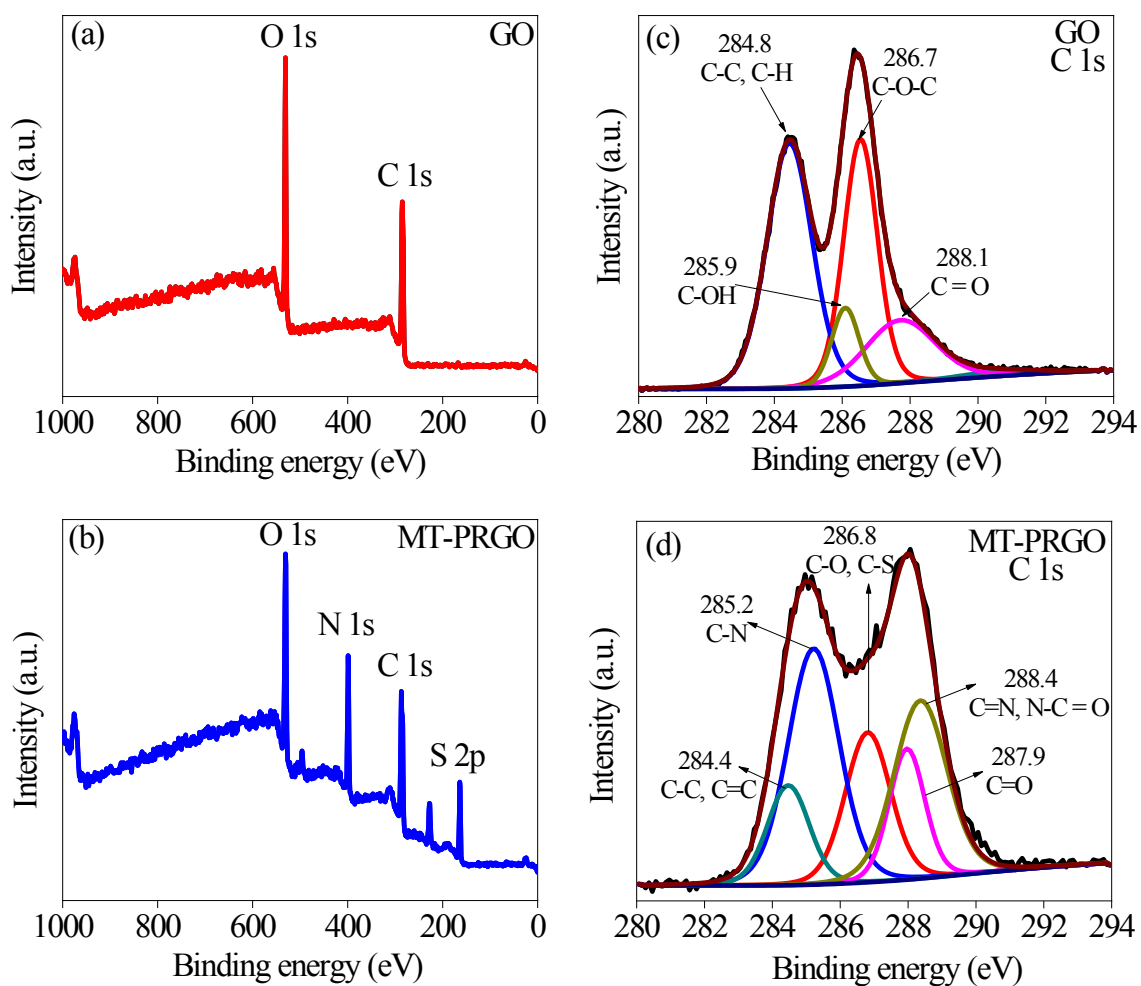

**Figure S4.** (a & b) XPS survey spectra, (c & d) C 1s of GO and MT-PRGO.

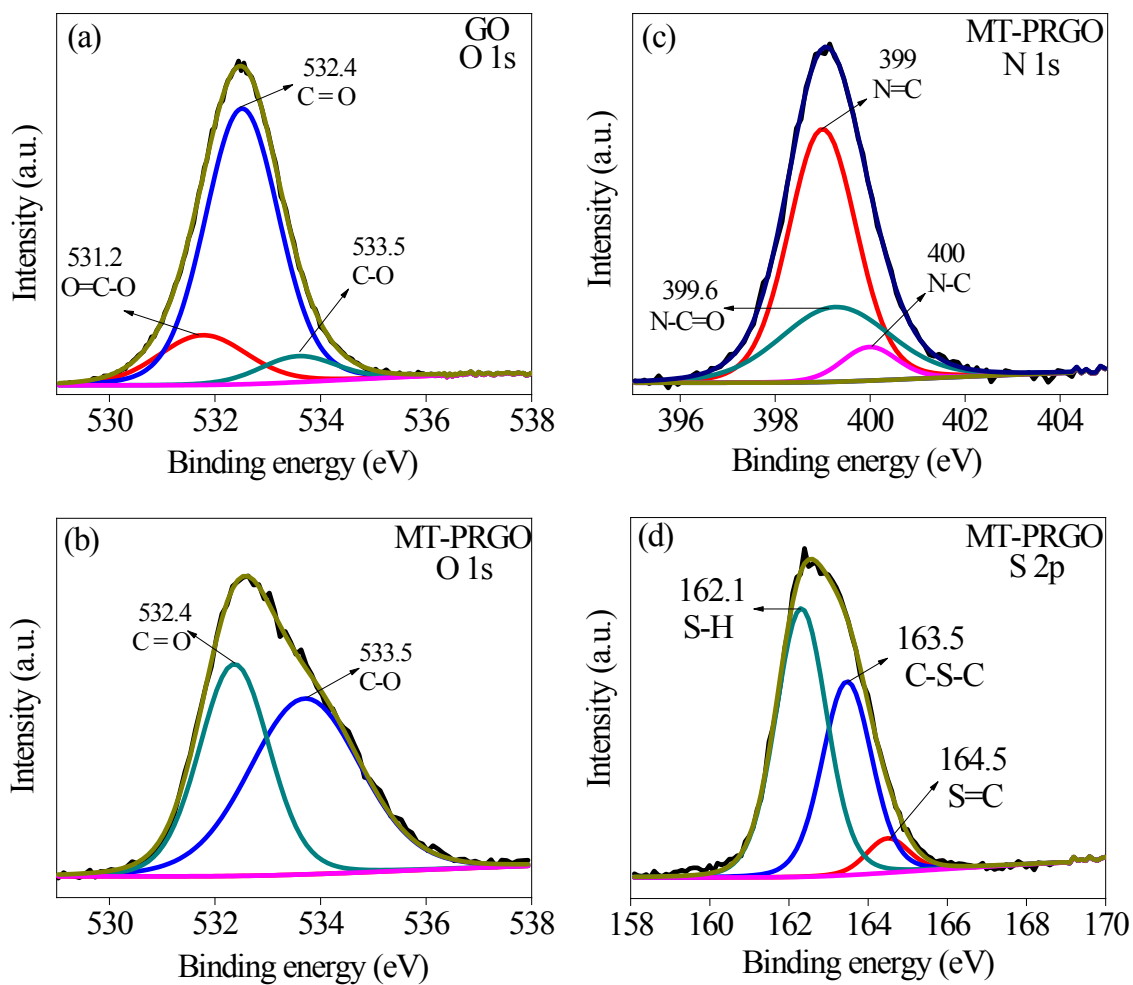

**Figure S5.** XPS spectra of (a & b) O 1s for GO and MT-PRGO, (c) N 1s, and (d) S 2p of MT-PRGO.

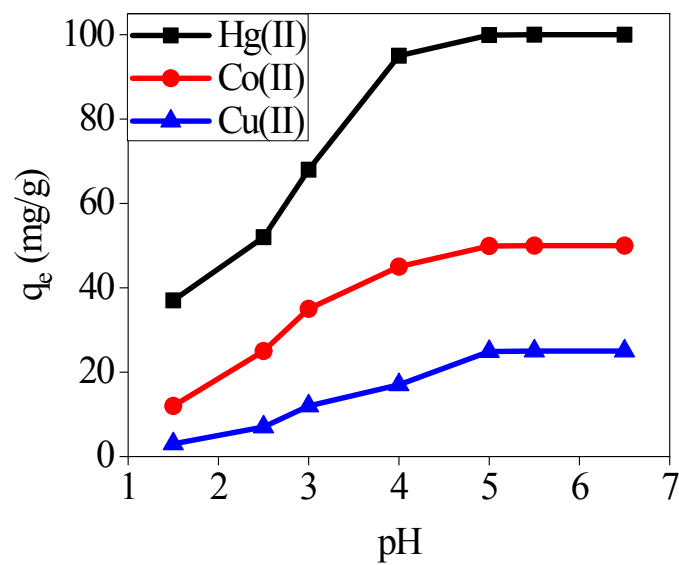

**Figure S6.** The effect of pH on the removal of Hg(II), Co(II), and Cu(II) ions by the MT-PRGO adsorbent [conditions:  $C_0 = (100, 50, 25 \text{ mg/g})$ , respectively,  $T = 298 \text{ K}$ ; adsorbent dose =  $0.005 \text{ g/5 mL}$ ,  $t = 6 \text{ h}$ ].

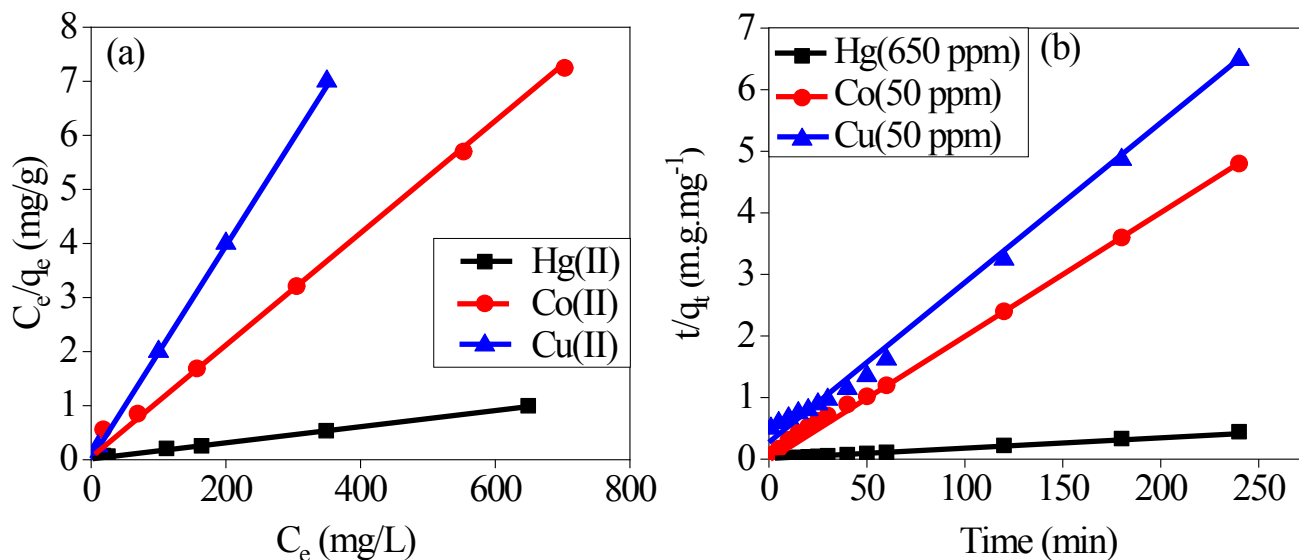

**Figure S7.** Langmuir isotherm model for the adsorption of Hg(II), Co(II), and Cu(II) ions on MT-PRGO. (B) Pseudo-second-order kinetic model for the adsorption Hg(II), Co(II), and Cu(II) ions on MT-PRGO.

**Table S1.** Parameters of the Langmuir isotherms model for the adsorption of Hg(II), Co(II), and Cu(II) ions on MT-PRGO.

| Metal ion | R <sup>2</sup> | b (L/mg) | Q <sub>max, fitted</sub> | Q <sub>exp</sub> | R <sub>L</sub> |
|-----------|----------------|----------|--------------------------|------------------|----------------|
| Hg(II)    | 0.997          | 0.096    | 661.0                    | 651.0            | 0.0079         |
| Co(II)    | 0.995          | 0.080    | 98.8                     | 98.0             | 0.0153         |
| Cu(II)    | 0.994          | 0.044    | 50.1                     | 50.0             | 0.0537         |

**Table S2.** Kinetic parameters for the adsorption of Hg(II), Co(II) and Cu(II) ions on MT-PRGO.

| Metal ion | q <sub>e, exp</sub> (mg g <sup>-1</sup> ) | q <sub>e, calc</sub> (mg g <sup>-1</sup> ) | k <sub>2</sub> (g mol <sup>-1</sup> min <sup>-1</sup> ) | R <sup>2</sup> |
|-----------|-------------------------------------------|--------------------------------------------|---------------------------------------------------------|----------------|
| Hg(II)    | 538.0                                     | 543.2                                      | 0.001218                                                | 0.997          |
| Co(II)    | 48.8                                      | 51.3                                       | 0.004029                                                | 0.998          |
| Cu(II)    | 40.1                                      | 39.5                                       | 0.002211                                                | 0.993          |



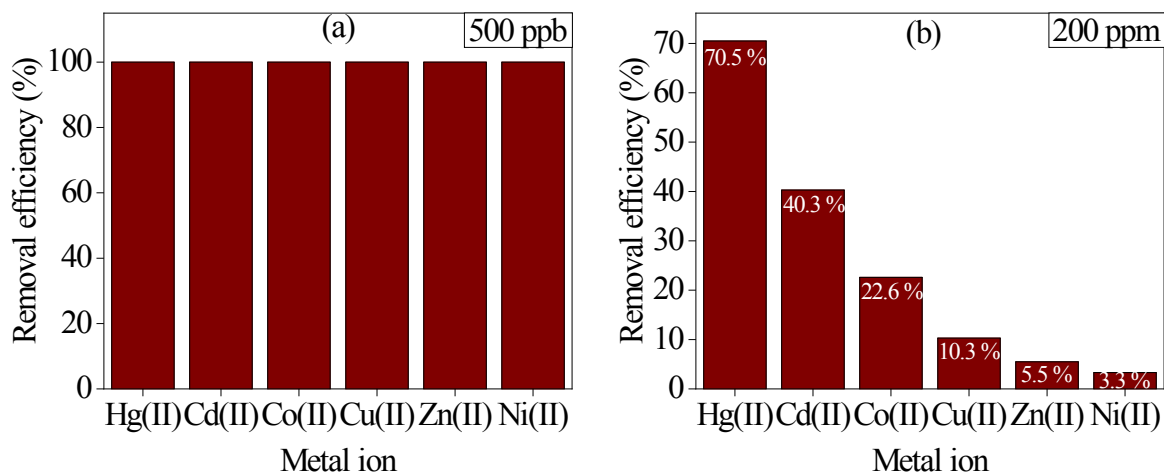

**Figure S8.** The effect of competitive ions on the removal of a mixture of toxic metals by MT-PRGO (a)  $C_0 = 500 \mu\text{g/L}$ , (b)  $C_0 = 200 \text{ mg/L}$  [conditions: adsorbent dose = 0.05 g/ 5 mL, pH = 5.5, T = 298 K].

**Table S3.** Adsorption capacities of MT-PRGO in mixed metal ions system 500 ppb and 200 ppm at pH 5.5.

| Concentration       | Metal ion                 | Hg(II) | Cd(II) | Co(II) | Cu(II) | Zn(II) | Ni(II) |
|---------------------|---------------------------|--------|--------|--------|--------|--------|--------|
| 500 $\mu\text{g/L}$ | $C_e$ (mg/L)              | 0      | 0      | 0      | 0      | 0      | 0      |
|                     | $q_e$ ( $\mu\text{g/g}$ ) | 500.0  | 500.0  | 500.0  | 500.0  | 500.0  | 500.0  |
| 200 mg/L            | $C_e$ (mg/L)              | 59.0   | 120.0  | 155.0  | 179.0  | 189.0  | 193.3  |
|                     | $q_e$ (mg/g)              | 141.0  | 80.0   | 40.0   | 21.0   | 11.0   | 6.7    |

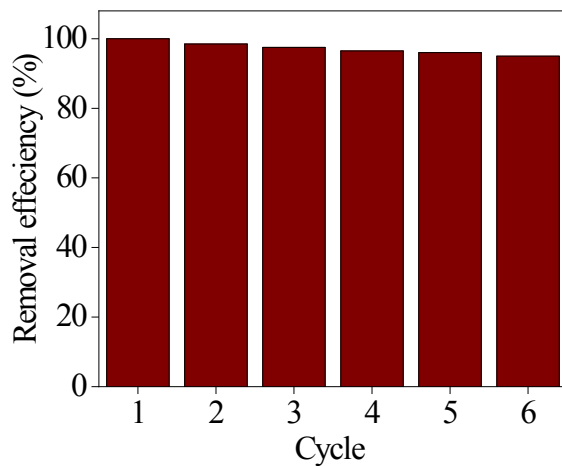

**Figure S9.** Recycling of MT-PRGO for the removal of Hg(II) [desorption condition: 1.0 M HNO<sub>3</sub>, adsorption conditions: pH 5.5, dose: 1 g/L, initial concentration of Hg (II) = 250 mg/L].

**Table S4.** Desorption studies of Hg(II) from MT-PRGO using HNO<sub>3</sub>.

| Metal           | Eluent                   | q <sub>e</sub> Adsorbed (mg/g) | q <sub>e</sub> Desorbed (mg/g) | De (%) |
|-----------------|--------------------------|--------------------------------|--------------------------------|--------|
| 250 mg/L Hg(II) | HNO <sub>3</sub> (0.5 M) | 232.0                          | 135.5                          | 58.40  |
|                 | HNO <sub>3</sub> (1.0 M) | 232.0                          | 155.2                          | 66.89  |
|                 | HNO <sub>3</sub> (1.5 M) | 232.0                          | 221.2                          | 95.34  |
|                 | HNO <sub>3</sub> (2.0 M) | 232.0                          | 232.0                          | 100.00 |

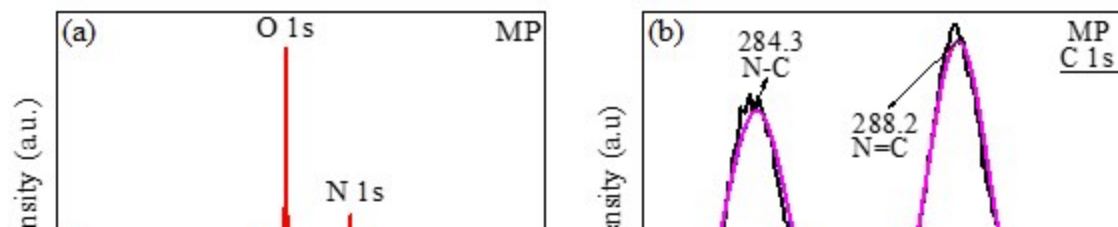

**Figure S10.** XPS spectra of MP (a) Survey scan, (b) C 1s, (c) N 1s, (d) P 2p, and (e) O 1s.

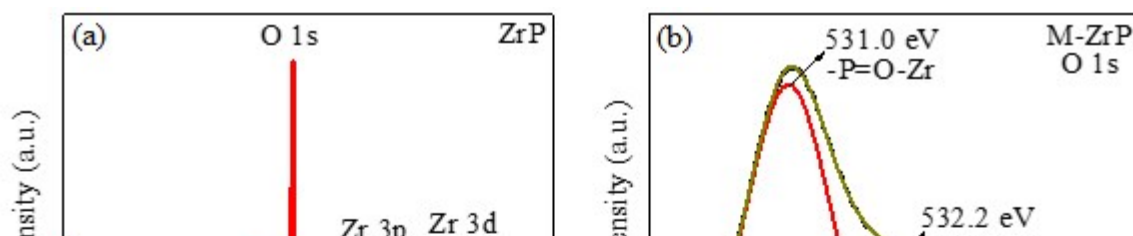

**Figure S11.** XPS spectra of ZrP (a) Survey scan, (b) O 1s, (c) P 2p, and (d) Zr 3d.

**Table S5.** Surface elemental composition of MP and M-ZrP from XPS analysis.

| Adsorbent | Elemental Content (%) |                 |                 |                 |                  |
|-----------|-----------------------|-----------------|-----------------|-----------------|------------------|
|           | C <sub>1s</sub>       | N <sub>1s</sub> | O <sub>1s</sub> | P <sub>2p</sub> | Zr <sub>3d</sub> |
| MP        | 10.8                  | 24.1            | 49.3            | 15.8            | 0.0              |
| ZrP       | 0.0                   | 0.0             | 57.2            | 20.3            | 22.5             |
| M-ZrP     | 8.8                   | 22.9            | 40.9            | 15.6            | 11.9             |

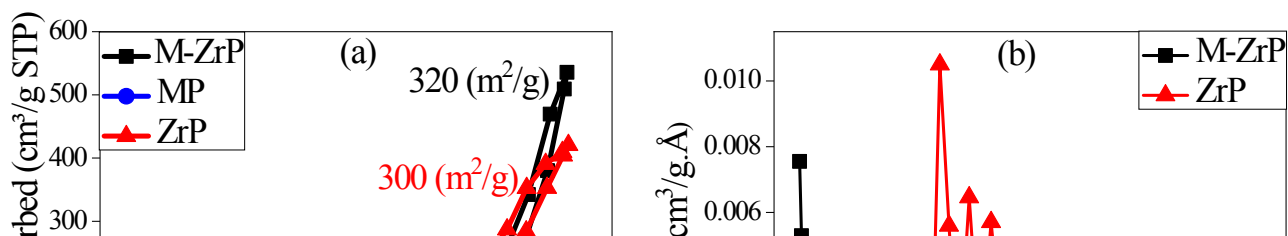

**Figure S12.** (a) N<sub>2</sub> adsorption-desorption isotherms of MP, ZrP, and M-ZrP. (b) Estimated pore size distributions of ZrP and M-ZrP.

**Table S6.** BET surface area and estimated pore volume of MP, ZrP and M-ZrP.

| Sample | Surface area (m <sup>2</sup> /g) | Pore volume (cm <sup>3</sup> /g.Å) |
|--------|----------------------------------|------------------------------------|
| MP     | 9                                | -                                  |
| ZrP    | 300                              | 0.010                              |
| M-ZrP  | 320                              | 0.008                              |

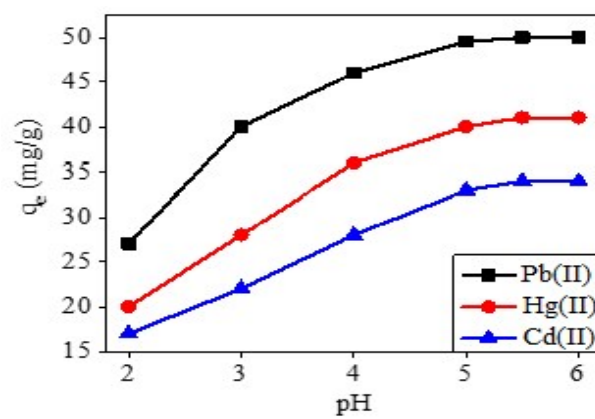

**Figure S13.** Dependence of the M-ZrP adsorption capacity of Pb(II), Hg(II), and Cd(II) ions on the pH of the solution [conditions:  $C_0 = 50 \text{ mg/L}$   $T = 298 \text{ K}$ ; adsorbent dose =  $0.005 \text{ g/5 mL}$ ].

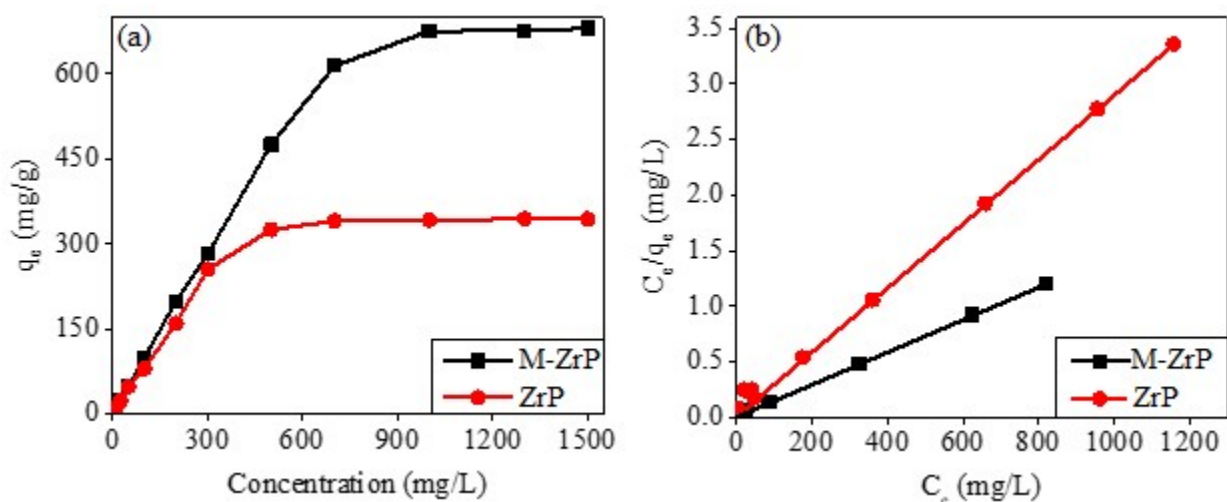

**Figure S14. (a)** Comparison of the removal of Pb(II) by the ZrP and M-ZrP adsorbents [Conditions:  $C_0 = 10 - 1500 \text{ mg/L}$  Pb(II), pH 5.5,  $T = 298 \text{ K}$ , adsorbent dose =  $0.005 \text{ g/5 mL}$ ]. **(b)** Langmuir isotherm model for the adsorption of Pb(II) on ZrP and M-ZrP. The parameters of the Langmuir-isotherms for the adsorption of Pb(II) on ZrP and M-ZrP are shown below.

| Langmuir parameters |       |                    |                          |                  |        |
|---------------------|-------|--------------------|--------------------------|------------------|--------|
| Adsorbent           | $R^2$ | $b \text{ (L/mg)}$ | $Q_{\text{max, fitted}}$ | $Q_{\text{exp}}$ | $R_L$  |
| M-ZrP               | 0.993 | 0.164              | 682.6                    | 680.4            | 0.0041 |
| ZrP                 | 0.997 | 0.024              | 348.3                    | 344.2            | 0.0400 |

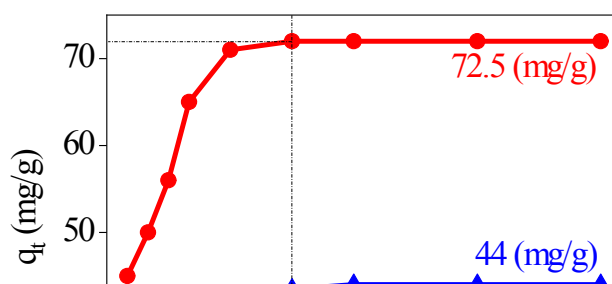

**Figure S15.** Effect of contact time on the removal of Hg(II) and Cd(II) ions by M-ZrP [Conditions:  $C_0 = 100$  mg/L, pH = 5.5; T = 298 K; adsorbent dose = 0.005 g/5 mL].

**Table S7.** Desorption studies of Pb(II), Hg(II) and Cd(II) from M-ZrP using different concentrations of nitric acid.

| Metal            | Eluent                   | $q_e$ Adsorbed (mg/g) | $q_e$ Desorbed (mg/g) | $D_e$ (%) |
|------------------|--------------------------|-----------------------|-----------------------|-----------|
| 1000 mg/L Pb(II) | HNO <sub>3</sub> (0.1 M) | 672.0                 | 564.0                 | 83.92     |
|                  | HNO <sub>3</sub> (0.5 M) | 672.0                 | 584.0                 | 86.90     |
|                  | HNO <sub>3</sub> (1.0 M) | 672.0                 | 646.0                 | 96.13     |
|                  | HNO <sub>3</sub> (1.5 M) | 642.0                 | 642.0                 | 100.0     |
| 300 mg/L Hg(II)  | HNO <sub>3</sub> (0.1 M) | 108.0                 | 78.0                  | 72.22     |
|                  | HNO <sub>3</sub> (0.5 M) | 108.0                 | 90.0                  | 83.33     |
|                  | HNO <sub>3</sub> (1.0 M) | 108.0                 | 98.0                  | 90.74     |
|                  | HNO <sub>3</sub> (1.5 M) | 108.0                 | 108.0                 | 100       |
| 300 mg/L Cd(II)  | HNO <sub>3</sub> (0.1 M) | 56.0                  | 37.5                  | 66.96     |
|                  | HNO <sub>3</sub> (0.5 M) | 56.0                  | 44.7                  | 79.82     |
|                  | HNO <sub>3</sub> (1.0 M) | 56.0                  | 53.0                  | 94.64     |
|                  | HNO <sub>3</sub> (1.5 M) | 56.0                  | 56.0                  | 100       |

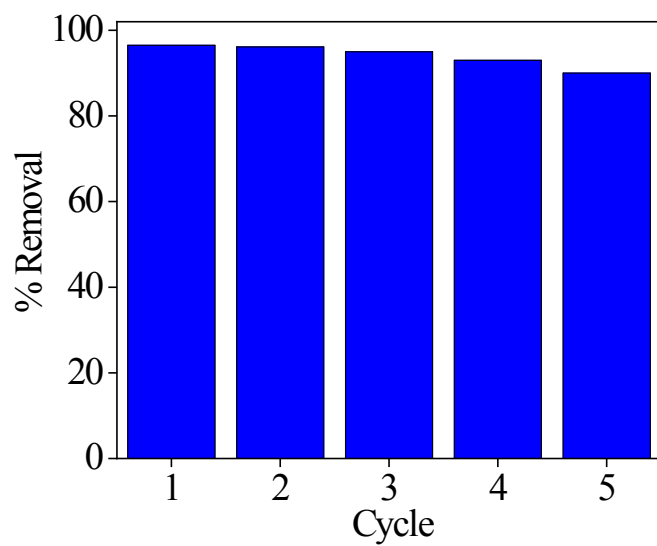

**Figure S16.** Recycling of M-ZrP adsorbent for the removal of Pb(II) (desorption condition: 1.5 M HNO<sub>3</sub>) [adsorption conditions: pH 5.5, dose = 1 g/L, initial concentration of Pb (II) = 1000 mg/L].

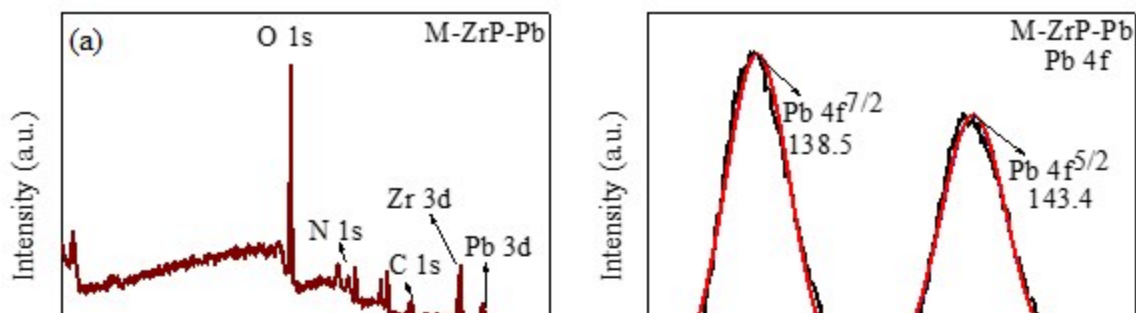



**Figure S17.** XPS spectra of M-ZrP after the adsorption of Pb(II) ions. (a) Survey scan and high resolution spectra of (b) Pb 4f, (c) C 1s, (d) Zr 3d (e) N 1s, and (f) O 1s electrons.
